# Supplementary material for: A first glance at the micro-ZnO coating of maize (Zea mays L.) seeds: a study of the elemental spatial distribution and Zn speciation analysis
Source: Royal Society of Chemistry journal article supplement (doi:10.1039/d0ja00282h), 2020-01-01
Supplement: d0ja00282h1.pdf [file d0ja00282h1.pdf]

1 Electronic supplementary information

2

3 **A first glance on the micro-ZnO coating in maize (*Zea mays* L.) seeds: study of the**  
4 **elemental spatial distribution and Zn speciation analysis**

5

6 Marcella N. Freitas<sup>1</sup>, Marcelo B. B. Guerra<sup>2,3,\*</sup>, Andressa Adame<sup>3</sup>, Thiago F. Moraes<sup>4</sup>,

7 José Lavres Junior<sup>5</sup>, Carlos A. Pérez<sup>6</sup>, Dalton B. Abdala<sup>6</sup>, and Silvio M. Cicero<sup>1</sup>

8

9 <sup>1</sup>Department of Crop Science, Luiz de Queiroz College of Agriculture (Esalq), University  
10 of São Paulo (USP), Piracicaba, São Paulo, SP, 13418900, Brazil.

11 <sup>2</sup>Department of Chemistry, Federal University of Lavras (UFLA), Campus Universitário,  
12 Lavras 37200-000, MG, Brazil.

13 <sup>3</sup>Laboratory of Analytical Chemistry, Center for Nuclear Energy in Agriculture (CENA),  
14 University of São Paulo (USP), Piracicaba, São Paulo, SP, 13416000, Brazil.

15 <sup>4</sup>Laboratory of Electronics, Federal University of Uberlândia (UFU), Uberlândia, Minas  
16 Gerais, MG, 38400902, Brazil.

17 <sup>5</sup>Laboratory of Mineral Nutrition of Plants, Center for Nuclear Energy in Agriculture  
18 (CENA), University of São Paulo (USP), Piracicaba, São Paulo, SP, 13416000, Brazil.

19 <sup>6</sup>Brazilian Synchrotron Light Laboratory (LNLS), National Center for Research in  
20 Energy and Materials (CNPEM), Campinas, São Paulo, SP, 13083970, Brazil.

21

22 **\*Corresponding author:** Marcelo Braga Bueno Guerra

23 e-mail: marcelo.guerra@ufla.br

24 Phone: + 55 35 2142-2081

25

26

27

28

29

30

31 **Daily monitoring of relative humidity and temperature during seed storage for 12**  
 32 **months**

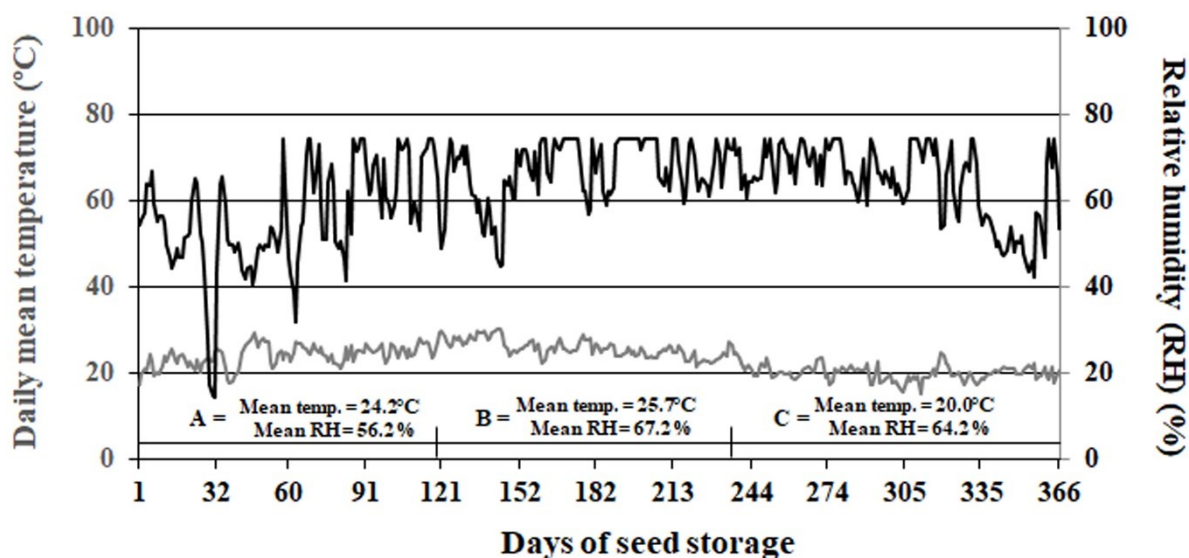

33

34 **Fig. S1** Daily mean values of relative humidity and temperature during storage (in dark  
 35 condition) for 12 months of ZnO-treated and untreated seeds. Values plotted in A, B, and  
 36 C correspond to mean temperature and relative humidity in the period of 4, 8, and 12  
 37 months, respectively.

38

39 **Table S1** Zn removal of untreated (control) and ZnO-treated seeds according to the  
 40 number of washings (extractions)

| Washing cycle                    | Untreated seeds                   |      |                             | ZnO-treated seeds                 |     |                             |
|----------------------------------|-----------------------------------|------|-----------------------------|-----------------------------------|-----|-----------------------------|
|                                  | Zn ( $\mu\text{g}$ ) <sup>1</sup> | SD   | Zn removed (%) <sup>2</sup> | Zn ( $\mu\text{g}$ ) <sup>1</sup> | SD  | Zn removed (%) <sup>2</sup> |
| 1 <sup>st</sup>                  | 0.29                              | 0.27 | 0.032                       | 928                               | 206 | 91.19                       |
| 2 <sup>nd</sup>                  | 0.23                              | 0.20 | 0.026                       | 68                                | 26  | 6.48                        |
| 3 <sup>rd</sup>                  | 0,28                              | 0,13 | 0.030                       | 13                                | 5   | 1.25                        |
| 4 <sup>th</sup>                  | 0.41                              | 0.55 | 0.034                       | 4.0                               | 1.6 | 0.43                        |
| 5 <sup>th</sup>                  | 0.27                              | 0.14 | 0.028                       | 2.2                               | 0.4 | 0.22                        |
| 6 <sup>th</sup>                  | 0.31                              | 0.17 | 0.029                       | 2.4                               | 0.7 | 0.25                        |
| 7 <sup>th</sup>                  | 0.28                              | 0.05 | 0.028                       | 1.7                               | 0.5 | 0.18                        |
| $\Sigma$ Zn removed <sup>2</sup> | 2.07                              |      |                             | 1019                              |     |                             |

41 <sup>1</sup>Mean values and standard deviation correspond to 3 replicates.

$$^{65}\text{Zn removed (\%)} = \left( \frac{\text{mass of Zn extracted in the washing cycle}}{\sum \text{mass of Zn removed in all cycles}} \right) \times 100$$

43

#### 44 **Calculation of limits of detection (LOD)**

45 Limits of detection (LOD) were calculated according to the general expression for  
 46 XRF analysis.<sup>1</sup> The following table summarizes the results:

47

48 **Table S2** Limit of detection for XRF analysis.

| Element | LOD (mg kg <sup>-1</sup> ) |
|---------|----------------------------|
| P       | 145                        |
| S       | 40                         |
| Zn      | 0.25                       |

49

#### 50 **Zn speciation analysis**

51 The excitation energy was selected using a Si(111) channel-cut crystal  
 52 monochromator and calibrated by defining the first derivate peak of a Zn foil spectrum to  
 53 be 9659.0 eV (Zn K-edge). Energy calibration was done in transmission mode. Spectra  
 54 from samples and standards were recorded in fluorescence mode. The excitation energy  
 55 was tuned across the Zn K-edge from 9579 to 9861 eV. Spectra were recorded from 9579  
 56 to 9639 eV using step sizes of 2 eV for the pre-edge region. 0.5 eV for the edge and 2 and  
 57 3 eV for the post-edge (9761 – 9861 eV). The count times and the number of scans were  
 58 adjusted according to the counting statistics for each sample and standard. Given this  
 59 conditions, the total number of point per scan was 314. The table 3 summarizes the main  
 60 experimental conditions for XANES measurements:

61

62 **Table S3** Experimental conditions for XANES measurements

| Energy range   | Energy step<br>(eV) | Measuring time /point (s) |           | Number of<br>points |
|----------------|---------------------|---------------------------|-----------|---------------------|
|                |                     | (Standards)               | (Samples) |                     |
| 9579 – 9639 eV | 2                   | 1                         | 3         | 30                  |
| 9639 – 9759 eV | 0.5                 | 2                         | 6         | 241                 |
| 9761 – 9829 eV | 2                   | 1                         | 3         | 31                  |
| 9831 – 9861 eV | 3                   | 1                         | 3         | 12                  |

63

64 **References**

- 65 1 R. E. Van Grieken and A. A. Markowicz. Eds.. *Handbook of X-Ray Spectrometry: methods and*  
66 *techniques*. Marcel Dekker, Inc. New York. v. 14. 1993.

67
